# Supplementary material
Source: PubMed Central journal article supplement (PMC4150770)
Supplement: supp_gku653_nar-00896-a-2014-File003.pdf [file supp_gku653_nar-00896-a-2014-File003.pdf]

## **SUPPLEMENTARY DATA**

### **Eukaryotic translation initiation factor eIF5 promotes the accuracy of start codon recognition by regulating P<sub>i</sub> release and conformational transitions of the preinitiation complex**

Adesh K. Saini<sup>1,3,†\*</sup>, Jagpreet S. Nanda<sup>2\*</sup>, Pilar Martin-Marcos<sup>1</sup>, Jinsheng Dong<sup>1</sup>, Fan Zhang<sup>1</sup>, Monika Bhardwaj<sup>3</sup>, Jon R. Lorsch<sup>2,†</sup>, and Alan G. Hinnebusch<sup>1,†</sup>

<sup>1</sup>Laboratory of Gene Regulation and Development, Eunice K. Shriver National Institute of Child Health and Human Development, National Institutes of Health, Bethesda, Maryland 20892, USA. <sup>2</sup>Laboratory on the Mechanism and Regulation of Protein Synthesis, Eunice K. Shriver National Institute of Child Health and Human Development, National Institutes of Health, Bethesda, Maryland 20892, USA.

<sup>3</sup>Shoolini University of Biotechnology and Management Sciences, Department of Biotechnology, Bajhol, Solan, India.

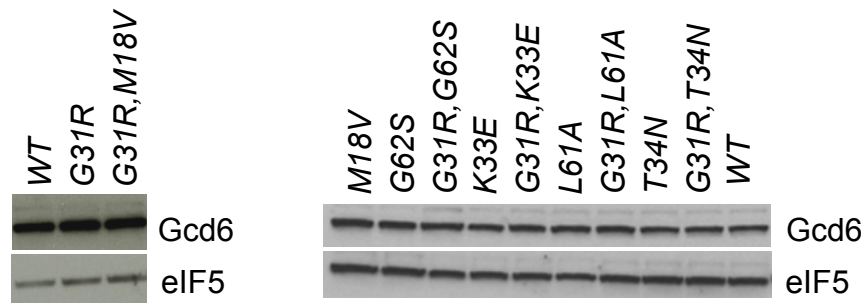

**Figure S1.** *TIF5* Ssu<sup>-</sup> substitutions do not alter steady-state levels of eIF5 in vivo. Derivatives of *his4-301 tif5Δ* strain ASY100 containing the indicated *TIF5* alleles on sc *LEU2* plasmids except *T34N*, which was expressed from a hc *LEU2* plasmid to match the expression level of FLAG-tagged WT eIF5 and containing (*left panel*) or lacking (*right panel*) *TIF5*<sup>+</sup> on a *URA3* plasmid were cultured in synthetic complete medium lacking leucine and uracil (SC-LU) or SC-L, respectively. WCEs were prepared under denaturing conditions, resolved by SDS-PAGE and subjected to Western blot analysis using antibodies against FLAG (eIF5) and Gcd6.

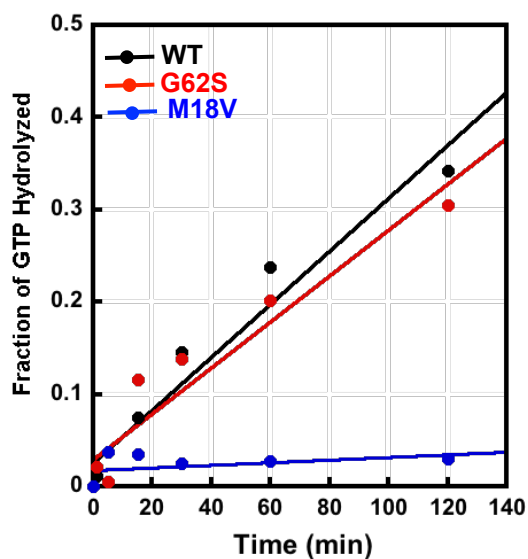

**Figure S2.** Effects of eIF5 Ssu<sup>-</sup> mutants G62S and M18V on GTP hydrolysis by isolated eIF2•GTP•Met-tRNA<sub>i</sub> ternary complexes. TC was assembled with [ $\gamma$ -<sup>32</sup>P]-GTP and GTP hydrolysis was initiated by addition of a saturating concentration of WT, G62S or M18V forms of eIF5. Reactions were stopped at different times with EDTA. The amount of P<sub>i</sub> formed over time was analyzed as described in Material and Methods. Rates of GTP hydrolysis are shown for TC with WT eIF5 (black circles; 0.0028 min<sup>-1</sup>), G62S eIF5 (red circles; 0.0024 min<sup>-1</sup>), and M18V eIF5 (blue circles; 0.00013 min<sup>-1</sup>).
